# Supplementary material for: Synbiotic Bacillus megaterium DSM 32963 and n-3 PUFA Salt Composition Elevates Pro-Resolving Lipid Mediator Levels in Healthy Subjects: A Randomized Controlled Study
Source: MDPI journal article supplement (doi:10.3390/nu16091354), 2024-04-30
Supplement: s1 [file s1]

**Supplementary Table S1:** Total and free EPA and DHA concentrations in plasma at baseline, after 2 days and 4 weeks of supplementation presented by study groups. Mean  $\pm$  95% CI. Differences in mean changes between SynΩ3 and placebo as well as SynΩ3 and Fish oil are shown.

| <i>n</i> -3 PUFA            | Assessment points | Placebo (n=24)<br>Mean (95% CI) |                | SynΩ3 (n=23)<br>Mean (95% CI) |                | Fish oil (n=25)<br>Mean (95% CI) |                | Difference in mean change<br>SynΩ3 vs. Placebo | p-value <sup>§</sup> | Difference in mean change<br>SynΩ3 vs. Fish oil | p-value <sup>#</sup> |
|-----------------------------|-------------------|---------------------------------|----------------|-------------------------------|----------------|----------------------------------|----------------|------------------------------------------------|----------------------|-------------------------------------------------|----------------------|
| <b>total EPA</b><br>[μg/mL] | Baseline          | <b>21.9</b>                     | (18.5, 25.4)   | <b>25.0</b>                   | (21.3, 28.7)   | <b>24.3</b>                      | (20.4, 28.3)   |                                                |                      |                                                 |                      |
|                             | 2 days            | <b>21.5</b>                     | (18.2, 24.8)   | <b>26.3</b>                   | (22.3, 30.2)   | <b>30.1</b>                      | (25.8, 34.3)   | 1.7                                            | <b>0.0445</b>        | -4.5                                            | <b>&lt;0.0001</b>    |
|                             | 4 weeks           | <b>26.4</b>                     | (20.7, 32.1)   | <b>30.3</b>                   | (25.4, 35.2)   | <b>37.9</b>                      | (33.6, 42.3)   | 0.8                                            | <b>0.4187*</b>       | -8.4                                            | <b>0.0055</b>        |
| <b>total DHA</b><br>[μg/mL] | Baseline          | <b>45.3</b>                     | (40.2, 50.5)   | <b>51.8</b>                   | (44.4, 59.2)   | <b>45.7</b>                      | (40.9, 50.5)   |                                                |                      |                                                 |                      |
|                             | 2 days            | <b>45.9</b>                     | (40.7, 51.1)   | <b>52.4</b>                   | (45.3, 59.5)   | <b>47.4</b>                      | (43.0, 51.7)   | 0.0                                            | <b>0.7073</b>        | -1.1                                            | <b>0.4535</b>        |
|                             | 4 weeks           | <b>48.0</b>                     | (41.1, 54.9)   | <b>54.9</b>                   | (47.6, 62.1)   | <b>55.6</b>                      | (50.0, 61.2)   | 0.5                                            | <b>0.8315*</b>       | -6.8                                            | <b>0.0173</b>        |
| <b>free EPA</b><br>[ng/mL]  | Baseline          | <b>621.7</b>                    | (452.7, 790.7) | <b>593.3</b>                  | (479.4, 707.2) | <b>646.6</b>                     | (546.9, 746.3) |                                                |                      |                                                 |                      |
|                             | 2 days            | <b>640.9</b>                    | (481.6, 800.2) | <b>748.9</b>                  | (609.3, 888.5) | <b>742.7</b>                     | (633.6, 851.8) | 136.4                                          | <b>0.0698</b>        | 59.5                                            | <b>0.3968</b>        |
|                             | 4 weeks           | <b>670.6</b>                    | (547.6, 793.7) | <b>810.3</b>                  | (661.3, 959.2) | <b>844.4</b>                     | (703.4, 985.3) | 168.0                                          | <b>0.0676</b>        | 19.2                                            | <b>0.7988</b>        |
| <b>free DHA</b><br>[ng/mL]  | Baseline          | <b>1307.0</b>                   | (1083, 1531)   | <b>1384.0</b>                 | (1177, 1591)   | <b>1315.0</b>                    | (1144, 1486)   |                                                |                      |                                                 |                      |
|                             | 2 days            | <b>1227.0</b>                   | (1033, 1420)   | <b>1406.0</b>                 | (1178, 1633)   | <b>1377.0</b>                    | (1169, 1584)   | 102.0                                          | <b>0.2069</b>        | -40.0                                           | <b>0.6535</b>        |
|                             | 4 weeks           | <b>1374.0</b>                   | (1149, 1598)   | <b>1452.0</b>                 | (1245, 1660)   | <b>1499.0</b>                    | (1206, 1791)   | 1.0                                            | <b>0.7530</b>        | -116.0                                          | <b>0.4390*</b>       |

\* Wilcoxon rank sum test; without \*: <sup>§</sup> ANCOVA, <sup>#</sup> unpaired t-test
