# Supplementary material for: Synbiotic Bacillus megaterium DSM 32963 and n-3 PUFA Salt Composition Elevates Pro-Resolving Lipid Mediator Levels in Healthy Subjects: A Randomized Controlled Study
Source: MDPI journal article supplement (doi:10.3390/nu16091354), 2024-04-30
Supplement: s1 [file s1]

**Supplementary Table S2:** TNF and hsCRP concentrations at baseline, after 2 days and 4 weeks of supplementation presented by study groups. Mean  $\pm$  95% CI. Differences in mean changes between SynΩ3 and placebo as well as SynΩ3 and Fish oil are shown.

| Inflammatory marker | Assessment points | Placebo (n=24)<br>Mean (95% CI) | SynΩ3 (n=23)<br>Mean (95% CI) | Fish oil (n=25)<br>Mean (95% CI) | Difference in mean change<br>SynΩ3 vs. Placebo | p-value <sup>\$</sup> | Difference in mean change<br>SynΩ3 vs. Fish oil | p-value <sup>#</sup> |
|---------------------|-------------------|---------------------------------|-------------------------------|----------------------------------|------------------------------------------------|-----------------------|-------------------------------------------------|----------------------|
| TNF-α [pg/mL]       | Baseline          | <b>6.05</b> (5.42, 6.69)        | <b>6.14</b> (5.41, 6.86)      | <b>6.17</b> (5.66, 6.68)         |                                                |                       |                                                 |                      |
|                     | 2 days            | <b>6.09</b> (5.40, 6.79)        | <b>5.95</b> (5.33, 6.58)      | <b>6.04</b> (5.57, 6.52)         | -0.22                                          | <b>0.3600</b>         | -0.06                                           | <b>0.7652</b>        |
|                     | 4 weeks           | <b>6.03</b> (5.26, 6.81)        | <b>6.23</b> (5.63, 6.83)      | <b>6.09</b> (5.62, 6.56)         | 0.12                                           | <b>0.5793*</b>        | 0.18                                            | <b>0.4541</b>        |
| hsCRP [mg/L]        | Baseline          | <b>2.46</b> (1.09, 3.83)        | <b>1.56</b> (0.90, 2.22)      | <b>1.70</b> (0.92, 2.47)         |                                                |                       |                                                 |                      |
|                     | 2 days            | <b>2.09</b> (1.17, 3.00)        | <b>1.71</b> (0.79, 2.64)      | <b>1.46</b> (0.87, 2.04)         | 0.53                                           | <b>0.2592*</b>        | 0.39                                            | <b>0.7721*</b>       |
|                     | 4 weeks           | <b>3.46</b> (1.44, 5.48)        | <b>1.93</b> (0.99, 2.88)      | <b>1.40</b> (0.87, 1.93)         | -0.63                                          | <b>0.7333*</b>        | 0.67                                            | <b>0.0862*</b>       |
